# Supplementary material for: Dopamine regulates renal osmoregulation during hyposaline stress via DRD1 in the spotted scat (Scatophagus argus)
Source: PubMed Central journal article supplement (PMC5114590; doi:10.1038/srep37535), 2016-11-18
Supplement: srep37535-s1.pdf [file srep37535-s1.pdf]

## **Supplementary Information**

### **Dopamine regulates renal osmoregulation during hyposaline stress *via* DRD1 in the spotted scat (*Scatophagus argus*)**

Maoliang Su<sup>1</sup>, Xingjiang Mu<sup>1</sup>, Lang Gui<sup>1</sup>, Peipei Zhang<sup>1</sup>, Jianan Zhou<sup>1</sup>, Jie Ma<sup>1</sup> & Junbin Zhang<sup>1</sup>

<sup>1</sup>Key Laboratory of Exploration and Utilization of Aquatic Genetic Resources, Ministry of Education, College of Fisheries and Life Science, Shanghai Ocean University, Shanghai 201306, China.

|       | Control group                   |                       | Treatment group                 |                       |
|-------|---------------------------------|-----------------------|---------------------------------|-----------------------|
|       | Gene name                       | Ct value $\pm$ S.E.M. | Gene name                       | Ct value $\pm$ S.E.M. |
| 1hpt  | <i><math>\beta</math>-actin</i> | 16.23 $\pm$ 0.05      | <i><math>\beta</math>-actin</i> | 16.12 $\pm$ 0.08      |
|       | <i>DRD1</i>                     | 28.50 $\pm$ 0.02      | <i>DRD1</i>                     | 28.04 $\pm$ 0.03      |
| 3hpt  | <i><math>\beta</math>-actin</i> | 16.19 $\pm$ 0.10      | <i><math>\beta</math>-actin</i> | 16.09 $\pm$ 0.03      |
|       | <i>DRD1</i>                     | 29.36 $\pm$ 0.05      | <i>DRD1</i>                     | 28.23 $\pm$ 0.25      |
| 6hpt  | <i><math>\beta</math>-actin</i> | 16.51 $\pm$ 0.08      | <i><math>\beta</math>-actin</i> | 16.71 $\pm$ 0.02      |
|       | <i>DRD1</i>                     | 28.58 $\pm$ 0.18      | <i>DRD1</i>                     | 28.59 $\pm$ 0.03      |
| 12hpt | <i><math>\beta</math>-actin</i> | 16.06 $\pm$ 0.05      | <i><math>\beta</math>-actin</i> | 16.44 $\pm$ 0.15      |
|       | <i>DRD1</i>                     | 29.41 $\pm$ 0.03      | <i>DRD1</i>                     | 28.79 $\pm$ 0.23      |
| 24hpt | <i><math>\beta</math>-actin</i> | 16.09 $\pm$ 0.08      | <i><math>\beta</math>-actin</i> | 16.09 $\pm$ 0.09      |
|       | <i>DRD1</i>                     | 28.67 $\pm$ 0.08      | <i>DRD1</i>                     | 28.60 $\pm$ 0.24      |
| 2dpt  | <i><math>\beta</math>-actin</i> | 16.97 $\pm$ 0.08      | <i><math>\beta</math>-actin</i> | 16.95 $\pm$ 0.07      |
|       | <i>DRD1</i>                     | 30.28 $\pm$ 0.04      | <i>DRD1</i>                     | 29.64 $\pm$ 0.20      |
| 7dpt  | <i><math>\beta</math>-actin</i> | 16.51 $\pm$ 0.06      | <i><math>\beta</math>-actin</i> | 16.63 $\pm$ 0.04      |
|       | <i>DRD1</i>                     | 29.54 $\pm$ 0.07      | <i>DRD1</i>                     | 29.79 $\pm$ 0.21      |

**Table S1. Ct values of *SaDRD1* gene expression levels in the analysis of RT-qPCR data.**

|       | Control group                   |                       | Treatment group                 |                       |
|-------|---------------------------------|-----------------------|---------------------------------|-----------------------|
|       | Gene name                       | Ct value $\pm$ S.E.M. | Gene name                       | Ct value $\pm$ S.E.M. |
| 1hpt  | <i><math>\beta</math>-actin</i> | 16.92 $\pm$ 0.15      | <i><math>\beta</math>-actin</i> | 16.52 $\pm$ 0.17      |
|       | <i>DRD5</i>                     | 30.51 $\pm$ 0.22      | <i>DRD5</i>                     | 30.40 $\pm$ 0.25      |
| 3hpt  | <i><math>\beta</math>-actin</i> | 16.96 $\pm$ 0.14      | <i><math>\beta</math>-actin</i> | 16.57 $\pm$ 0.13      |
|       | <i>DRD5</i>                     | 29.51 $\pm$ 0.16      | <i>DRD5</i>                     | 28.39 $\pm$ 0.21      |
| 6hpt  | <i><math>\beta</math>-actin</i> | 16.89 $\pm$ 0.23      | <i><math>\beta</math>-actin</i> | 16.97 $\pm$ 0.04      |
|       | <i>DRD5</i>                     | 29.84 $\pm$ 0.24      | <i>DRD5</i>                     | ND                    |
| 12hpt | <i><math>\beta</math>-actin</i> | 16.98 $\pm$ 0.05      | <i><math>\beta</math>-actin</i> | 17.13 $\pm$ 0.06      |
|       | <i>DRD5</i>                     | 30.36 $\pm$ 0.21      | <i>DRD5</i>                     | 29.75 $\pm$ 0.12      |
| 24hpt | <i><math>\beta</math>-actin</i> | 16.88 $\pm$ 0.11      | <i><math>\beta</math>-actin</i> | 16.98 $\pm$ 0.16      |
|       | <i>DRD5</i>                     | 31.74 $\pm$ 0.09      | <i>DRD5</i>                     | 32.08 $\pm$ 0.28      |
| 2dpt  | <i><math>\beta</math>-actin</i> | 16.79 $\pm$ 0.06      | <i><math>\beta</math>-actin</i> | 16.67 $\pm$ 0.11      |
|       | <i>DRD5</i>                     | 31.10 $\pm$ 0.12      | <i>DRD5</i>                     | ND                    |
| 7dpt  | <i><math>\beta</math>-actin</i> | 16.32 $\pm$ 0.08      | <i><math>\beta</math>-actin</i> | 16.22 $\pm$ 0.10      |
|       | <i>DRD5</i>                     | 31.32 $\pm$ 0.05      | <i>DRD5</i>                     | ND                    |

**Table S2. Ct values of *SaDRD5* gene expression levels in the analysis of RT-qPCR data. “ND” represents “not be detected”.**

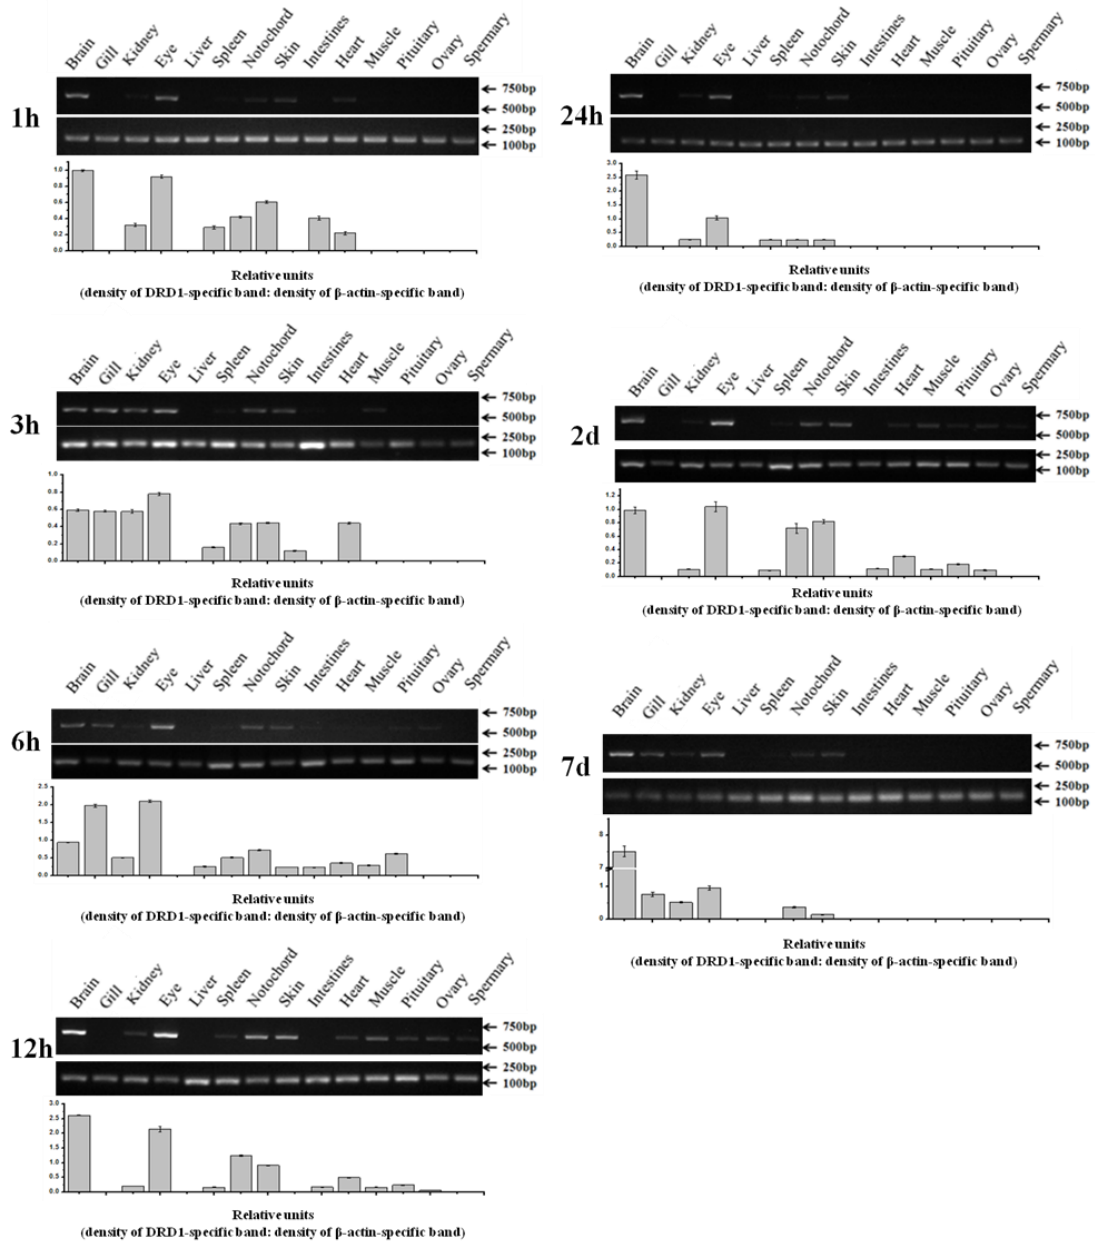

**Figure S1. Tissue distributions of *SaDRD1* gene after FW-shock at different time points.** The results are presented as relative units (density of *DRD1*-specific band versus density of  $\beta$ -actin-specific band).

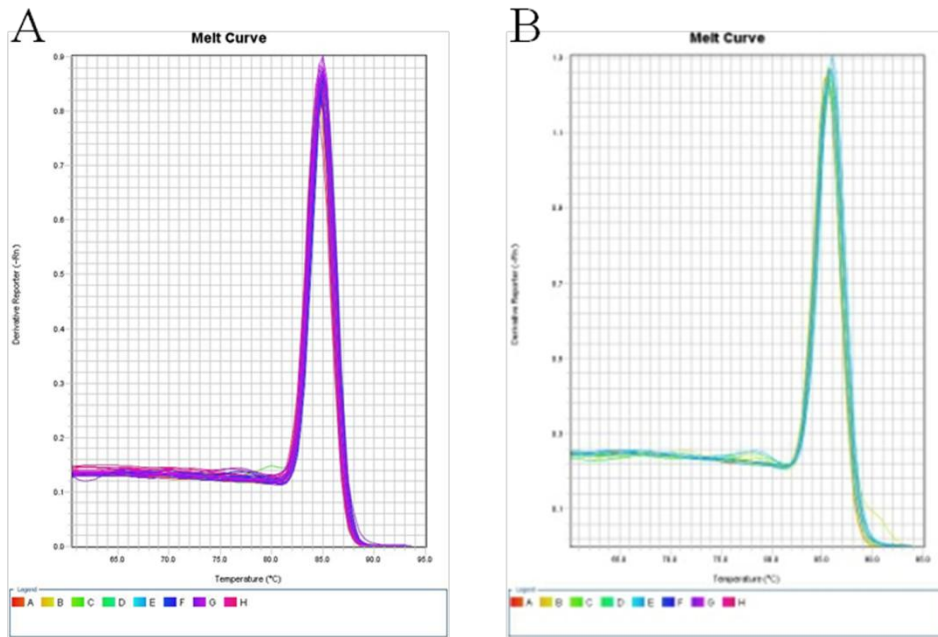

Figure S2. The melt curve of *SaDRD1* (A) and *SaDRD5* (B) in RT-qPCR.
